# Supplementary material for: Temperature dependence of the interfacial bonding characteristics of silica/styrene butadiene rubber composites: a molecular dynamics simulation study
Source: Royal Society of Chemistry journal article supplement (doi:10.1039/c9ra08325a), 2019-01-01
Supplement: c9ra08325a1.pdf [file c9ra08325a1.pdf]

## Supplementary Information

### Temperature dependence of interfacial bonding characteristics of silica/styrene butadiene rubber composites: A molecular dynamics simulation study

Yanlong Luo,<sup>\*a,b</sup> Haobei Liu,<sup>c</sup> Bo Xiang,<sup>a,b</sup> Xianling Chen,<sup>a</sup> Wei Yang<sup>d</sup> and Zhenyang Luo<sup>\*a,b</sup>

<sup>a</sup>College of Science, Nanjing Forestry University, Nanjing 210037, China

<sup>b</sup>Institute of Polymer Materials, Nanjing Forestry University, Nanjing 210037, China

<sup>c</sup>College of Materials Science and Engineering, Nanjing Tech University, Nanjing 21009, China

<sup>d</sup>State Key Laboratory of Advanced Power Transmission Technology, State Grid Global Energy Interconnection Research Institute, Beijing 102211, China

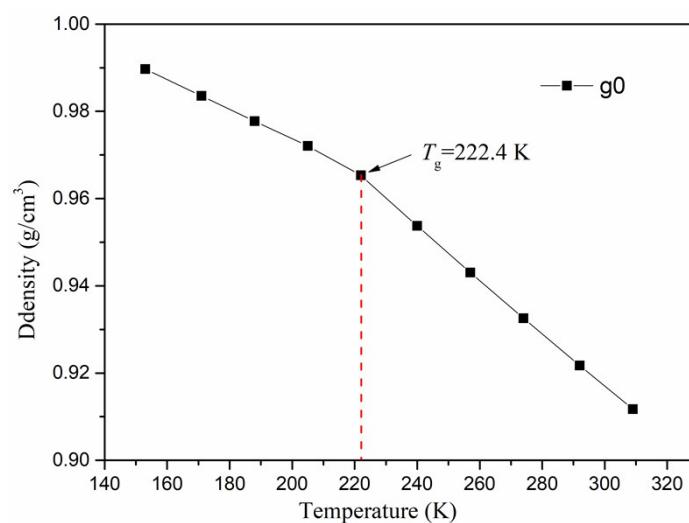

Figure S1 The curve of density with temperature

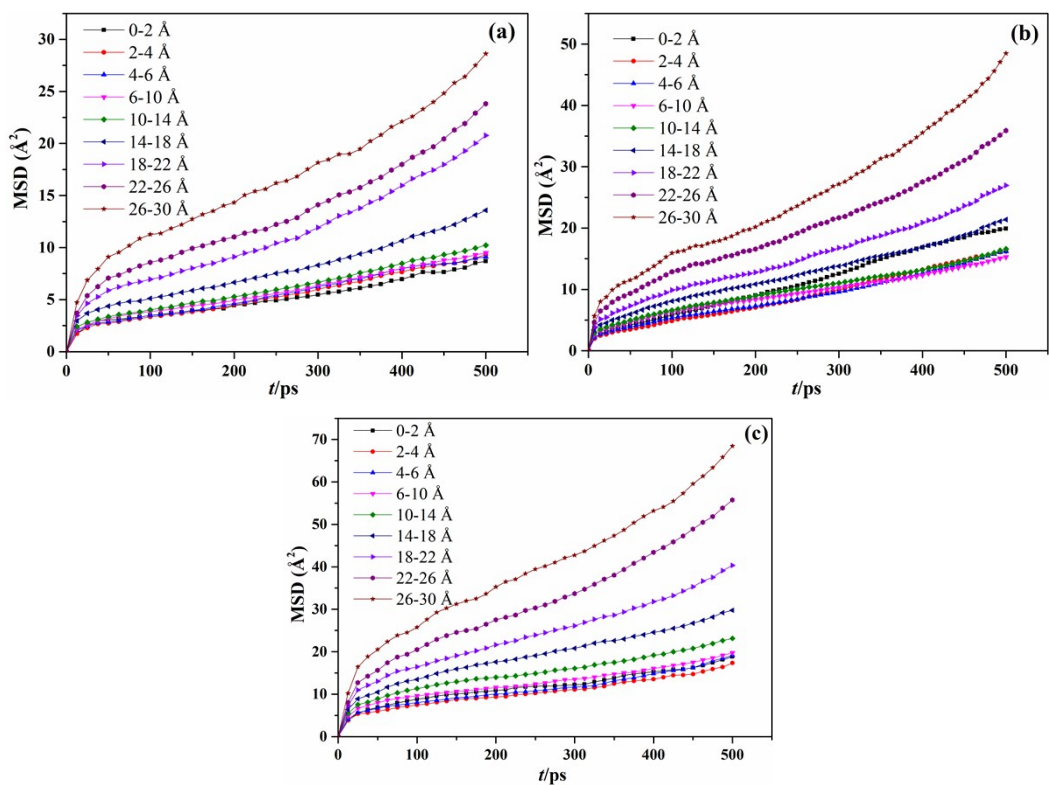

Figure S2 MSDs of silica/g0 composite at different temperatures: (a) 200K, (b) 298K, and (c) 373K.

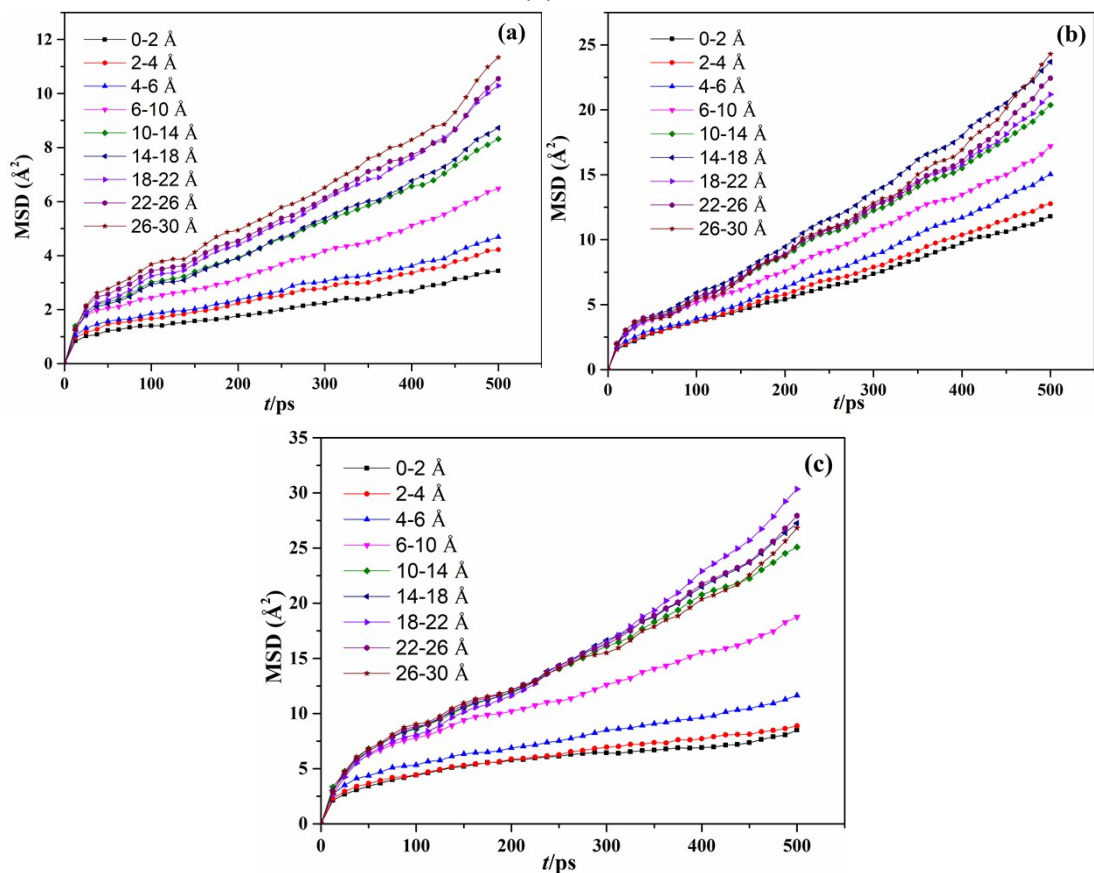

Figure S3 MSDs of silica/g15 composite at different temperatures: (a) 200K, (b) 298K, and (c) 373K.
